# Supplementary material
Source: PubMed Central journal article supplement (PMC9577818)
Supplement: sj-pdf-1-irx-10.1177_01600176221132230.pdf [file sj-pdf-1-irx-10.1177_01600176221132230.pdf]

## Supplementary files

SF1. Descriptive statistics for four impact indexes at the state level

|             | <b>OSI</b> | <b>ERI</b> | <b>OCI</b> | <b>FSI</b> |
|-------------|------------|------------|------------|------------|
| <b>mean</b> | -0.48      | -0.53      | -0.17      | -0.31      |
| <b>std</b>  | 0.09       | 0.07       | 0.08       | 0.03       |
| <b>min</b>  | -0.77      | -0.7       | -0.54      | -0.44      |
| <b>25%</b>  | -0.53      | -0.58      | -0.2       | -0.32      |
| <b>50%</b>  | -0.47      | -0.54      | -0.15      | -0.31      |
| <b>75%</b>  | -0.41      | -0.49      | -0.12      | -0.29      |
| <b>max</b>  | -0.19      | -0.21      | -0.02      | -0.23      |
| <b>Obs.</b> | 1920       | 1920       | 1920       | 1296       |

SF2. Pairwise Pearson's correlation coefficients among four Indexes

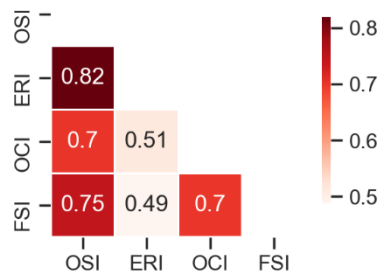

*Note: All of the coefficients are statistically significant at the 1% level.*

SF3. Pairwise Pearson's Correlation Coefficients among Longitudinal Independent Variables

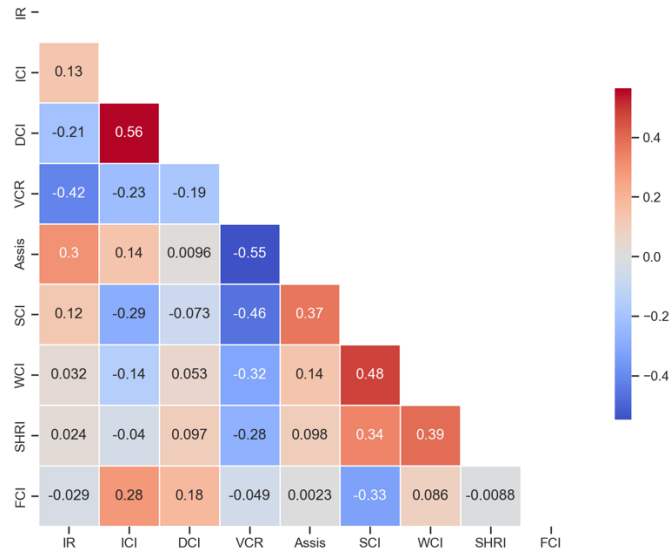

*Note: All the above Pearson's correlation coefficients are statistically significant at the 5% level, except for those between: IR and WCI, IR and SHRI, IR and FCI, ICI and SHRI, DCI and Assis, Assis and FCI, and SHRI and FCI.*

#### SF4. Herfindahl–Hirschman Index (HHI) across the States

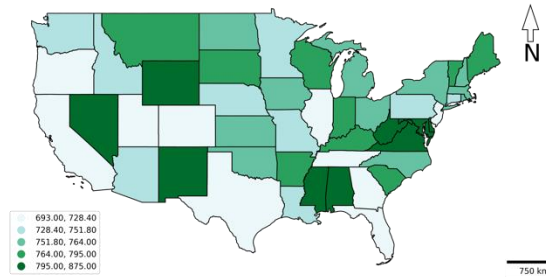

SF5. Percentage of “High-Status” Industries (HSI) across the States

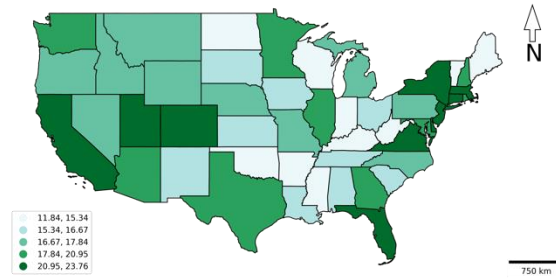

SF6. Percentage of Workers in Essential Industries across the States

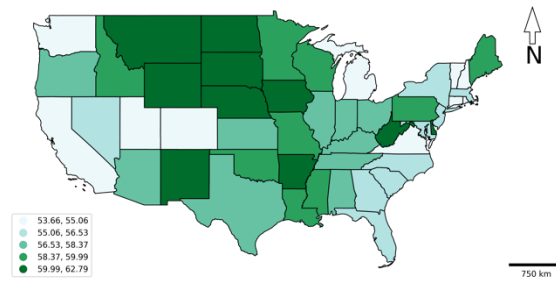

SF7. The Socioeconomic Vulnerability Indexes across the States

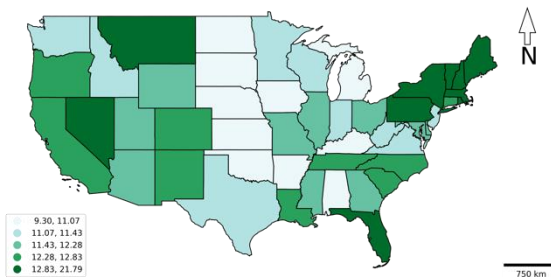

VI

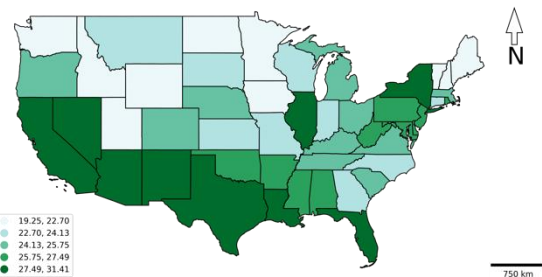

CRE3

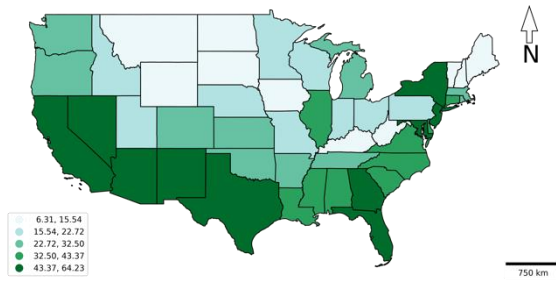

EssMinority

SF8. Percentage of Urban Areas and Political Partisanship across the States

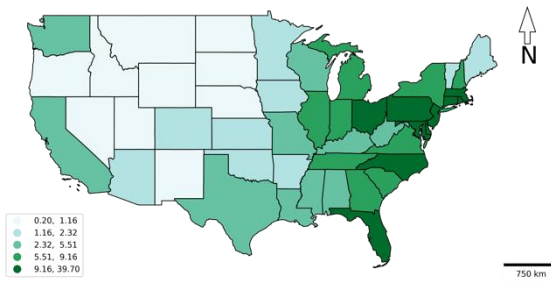

Percentage of urban areas  
(AREAPCT\_URBAN)

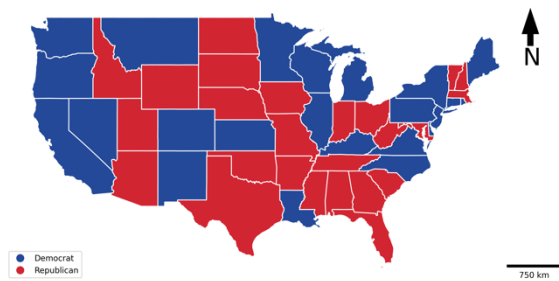

Party

SF9. Pairwise Pearson's Correlation Coefficients among Cross-sectional Independent Variables

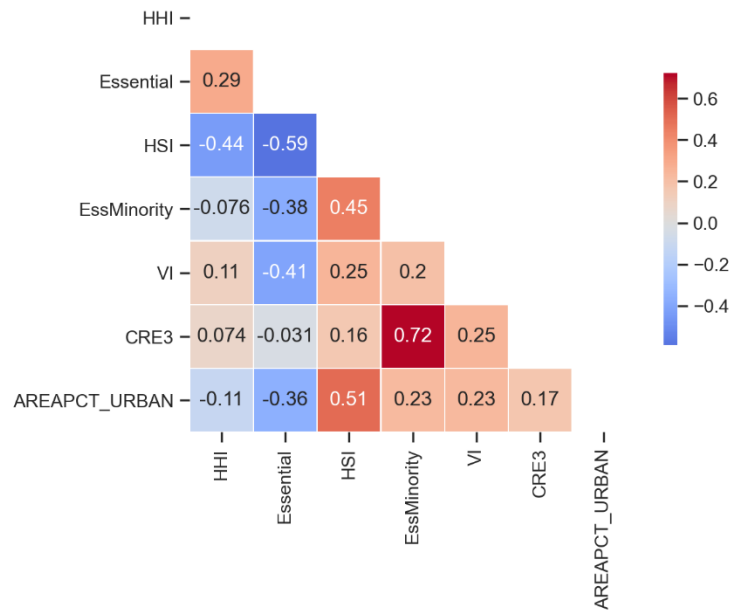

*Note: The Pearson's correlation coefficients between the following variables are statistically significant at the 5% level: HHI and Essential, HHI and HSI, Essential and HSI, Essential and EssMinority, Essential and VI, Essential and AREAPCT\_URBAN, HSI and AREAPCT, HSI and AREAPCT\_URBAN, and EssMinority and CRE3.*

SF10 (a) Modeling the trajectories with quadratic function (48 contiguous U.S. States) – Phases 1-3

|                            | Parameter     |                    | Overall Sentiment Index (OSI) | Expected Recovery Index (ERI) | Operational Challenges Index (OCI) | Financial Stress Index (FSI) |
|----------------------------|---------------|--------------------|-------------------------------|-------------------------------|------------------------------------|------------------------------|
| Initial status, $\pi_{0i}$ | Intercept     | $\beta_{00}$       | -0.6623 (0.0091) ***          | -0.6102 (0.0075) ***          | -0.3634 (0.0074) ***               | -0.3625 (0.0039) ***         |
|                            | HHI           | $\beta_{01}$       | 0.0375 (1.2589)               | -0.2343 (0.9816)              | 0.6285 (0.7524)                    | 0.0817 (0.4663)              |
|                            | Essential     | $\beta_{02}$       | 0.4168 (0.2510)               | 0.2093 (0.1958)               | 0.1507 (0.1505)                    | 0.2171 (0.0931) *            |
|                            | EssMinority   | $\beta_{03}$       | 0.0000 (0.0546)               | -0.0106 (0.0426)              | 0.0273 (0.0326)                    | 0.0076 (0.0202)              |
|                            | HSI           | $\beta_{04}$       | -0.0916 (0.2255)              | -0.2208 (0.1758)              | 0.2054 (0.1349)                    | 0.1633 (0.0836)              |
|                            | VI            | $\beta_{05}$       | 0.0165 (0.2691)               | -0.3031 (0.2098)              | 0.1498 (0.1608)                    | 0.1947 (0.0997)              |
|                            | CRE3          | $\beta_{06}$       | -0.0064 (0.0026) *            | -0.0027 (0.0020)              | -0.0006 (0.0015)                   | -0.0023 (0.0010) *           |
|                            | AREAPCT_URBAN | $\beta_{08}$       | -0.1119 (0.0505) *            | -0.0930 (0.0395) *            | -0.0315 (0.0306)                   | -0.0679 (0.0188) ***         |
| Party (Republican)         | $\beta_{09}$  | 0.0246 (0.0094) ** | 0.0283 (0.0073) ***           | 0.0079 (0.0057)               | 0.0029 (0.0035)                    |                              |
| Rate of change,            | Week          | $\beta_{w10}$      | 1.5280 (0.0623) ***           | 0.6462 (0.0543) ***           | 1.7307 (0.0622) ***                | 0.5671 (0.0304) ***          |
|                            | $Week^2$      | $\beta_{w20}$      | -2.7566 (0.1470) ***          | -1.2689 (0.1283) ***          | -3.8884 (0.1472) ***               | -1.1673 (0.0719) ***         |
| Time-varying variable      | IR            | $\beta_{20}$       | 0.0015 (0.0099)               | -0.0019 (0.0086)              | -0.0179 (0.0099)                   | -0.0103 (0.0048) *           |
|                            | ICI           | $\beta_{30}$       | -0.2775 (0.0768) ***          | -0.3742 (0.0670) ***          | -0.5836 (0.0770) ***               | -0.0831 (0.0376) *           |
|                            | DCI           | $\beta_{40}$       | -0.0076 (0.0041)              | 0.0024 (0.0036)               | -0.0082 (0.0041) *                 | -0.0043 (0.0020) *           |
|                            | VCR           | $\beta_{50}$       |                               |                               |                                    |                              |
|                            | SCI           | $\beta_{60}$       | -0.0068 (0.0090)              | -0.0377 (0.0079) ***          | 0.0518 (0.0090) ***                | 0.0145 (0.0044) **           |
|                            | WCI           | $\beta_{70}$       | -0.0025 (0.0071)              | 0.0148 (0.0061) *             | -0.0361 (0.0069) ***               | -0.0020 (0.0034)             |
|                            | SHRI          | $\beta_{80}$       | -0.0081 (0.0085)              | 0.0094 (0.0073)               | -0.0547 (0.0081) ***               | -0.0154 (0.0041) ***         |

|                                    |                    |              |                  |                 |                         |                     |
|------------------------------------|--------------------|--------------|------------------|-----------------|-------------------------|---------------------|
|                                    | FCI                | $\beta_{90}$ | -0.0093 (0.0078) | 0.0028 (0.0068) | -0.0425 (0.0076)<br>*** | -0.0100 (0.0038) ** |
| Goodness-of-fit (stochastic parts) |                    |              |                  |                 |                         |                     |
|                                    | AIC                |              | -4906.7151       | -5268.3991      | -4935.8502              | -6780.8346          |
|                                    | BIC                |              | -4798.2073       | -5159.8913      | -4827.3424              | -6672.3268          |
|                                    | Log Likelihood     |              | 2474.3575        | 2655.1995       | 2488.9251               | 3411.4173           |
|                                    | Num. obs.          |              | 1296             | 1296            | 1296                    | 1296                |
|                                    | Num. groups: State |              | 48               | 48              | 48                      | 48                  |

Note: \*\*\*  $p < 0.001$ ; \*\*  $p < 0.01$ ; \*  $p < 0.05$ ; inside the parentheses are standard errors

SF 10 (b) Modeling the trajectories with quadratic function (48 contiguous U.S. states) – Phases 4-5

|                            | Parameter          |               | Overall Sentiment Index (OSI) | Expected Recovery Index (ERI) | Operational Challenges Index (OCI) | Financial Stress Index (FSI) |
|----------------------------|--------------------|---------------|-------------------------------|-------------------------------|------------------------------------|------------------------------|
| Initial status, $\pi_{0i}$ | Intercept          | $\beta_{00}$  | -0.5292 (0.0104)<br>***       | -0.6194 (0.0095) ***          | -0.1611 (0.0064) ***               |                              |
|                            | HHI                | $\beta_{01}$  | 0.2126 (1.0493)               | -0.2626 (0.9733)              | 0.1759 (0.3788)                    |                              |
|                            | Essential          | $\beta_{02}$  | 0.2975 (0.2053)               | 0.4386 (0.1906) *             | 0.0286 (0.0708)                    |                              |
|                            | EssMinority        | $\beta_{03}$  | -0.0564 (0.0452)              | -0.0235 (0.0420)              | -0.0101 (0.0160)                   |                              |
|                            | HSI                | $\beta_{04}$  | 0.0975 (0.1863)               | 0.0555 (0.1729)               | 0.2087 (0.0658) **                 |                              |
|                            | VI                 | $\beta_{05}$  | 0.0615 (0.2229)               | 0.1305 (0.2068)               | 0.1869 (0.0783) *                  |                              |
|                            | CRE3               | $\beta_{06}$  | -0.0074 (0.0021)<br>***       | -0.0050 (0.0020) **           | -0.0010 (0.0007)                   |                              |
|                            | AREAPCT_URBAN      | $\beta_{08}$  | -0.0830 (0.0418)<br>*         | -0.0991 (0.0387) *            | -0.0023 (0.0150)                   |                              |
|                            | Party (Republican) | $\beta_{09}$  | 0.0193 (0.0080) *             | 0.0219 (0.0074) **            | 0.0005 (0.0029)                    |                              |
| Rate of change,            | Week               | $\beta_{w10}$ | 1.0956 (0.1811)<br>***        | 1.4140 (0.1645) ***           | 1.4660 (0.1302) ***                |                              |
|                            | $Week^2$           | $\beta_{w20}$ | -4.1155 (0.8272)<br>***       | -4.8847 (0.7510) ***          | -7.7259 (0.6187) ***               |                              |

|                                    |                    |              |                       |                  |                      |  |
|------------------------------------|--------------------|--------------|-----------------------|------------------|----------------------|--|
| Time-varying variable              | IR                 | $\beta_{20}$ | 0.0207 (0.0200)       | -0.0071 (0.0182) | 0.0152 (0.0147)      |  |
|                                    | ICI                | $\beta_{30}$ | -0.1967 (0.1194)      | -0.1629 (0.1084) | -0.3894 (0.0895) *** |  |
|                                    | DCI                | $\beta_{40}$ | 0.0060 (0.0042)       | 0.0072 (0.0038)  | 0.0064 (0.0032) *    |  |
|                                    | VCR                | $\beta_{50}$ | 0.0432 (0.0419)       | 0.0562 (0.0380)  | 0.0482 (0.0297)      |  |
|                                    | SCI                | $\beta_{60}$ | -0.0037 (0.0180)      | -0.0127 (0.0164) | 0.0081 (0.0117)      |  |
|                                    | WCI                | $\beta_{70}$ | 0.0326 (0.0126)<br>** | 0.0131 (0.0115)  | -0.0002 (0.0075)     |  |
|                                    | SHRI               | $\beta_{80}$ | -0.0086 (0.0121)      | -0.0039 (0.0110) | -0.0052 (0.0071)     |  |
|                                    | FCI                | $\beta_{90}$ | -0.0275 (0.0135)<br>* | -0.0224 (0.0123) | -0.0115 (0.0088)     |  |
| Goodness-of-fit (stochastic parts) |                    |              |                       |                  |                      |  |
|                                    | AIC                |              | -2391.6072            | -2510.3176       | -2769.2341           |  |
|                                    | BIC                |              | -2294.1534            | -2412.8638       | -2671.7802           |  |
|                                    | Log Likelihood     |              | 1217.8036             | 1277.1588        | 1406.6170            |  |
|                                    | Num. obs.          |              | 620                   | 620              | 620                  |  |
|                                    | Num. groups: State |              | 48                    | 48               | 48                   |  |

Note: \*\*\*  $p < 0.001$ ; \*\*  $p < 0.01$ ; \*  $p < 0.05$ ; inside the parentheses are standard errors
